# Supplementary material for: Berberine isolation from Coscinium fenestratum: optical, electrochemical, and computational studies
Source: Royal Society of Chemistry journal article supplement (doi:10.1039/d3ra01769a), 2023-01-01
Supplement: d3ra01769a1.pdf [file d3ra01769a1.pdf]

## Supporting Information for:

### **Berberine isolation from *Coscinium fenestratum*: optical, electrochemical, and computational studies**

*R. M. Gamini Rajapakse*<sup>a\*</sup>, *Benjamin R. Horrocks*<sup>b\*</sup>, *A. U. Malikaramage*<sup>a</sup>, *H. M. N. P. Gunarathna*<sup>a</sup>, *M. G. S. A. M. E. W. D. D. K. Egodawele*<sup>a</sup>, *J.M. Susanthi Jayasinghe*<sup>a</sup>, *Udayana Ranatunga*<sup>a</sup>, *W. H. M. R. N. K. Herath*<sup>a</sup>, *Lahiru Sandakelum*<sup>a</sup>, *Shane Wylie*<sup>a</sup>, *P. G. P. R. Abewardana*<sup>a</sup>, *V.N. Seneviratne*<sup>a</sup>, *L.L.K. Perera*<sup>a</sup> and *D. Velauthapillai*<sup>c</sup>

<sup>a</sup> Department of Chemistry, University of Peradeniya, Peradeniya 20400, Sri Lanka

<sup>b</sup> School of Natural and Environmental Sciences, Newcastle University, Newcastle upon Tyne NE1 4LB, United Kingdom

<sup>c</sup> Advanced Nanomaterials for Clean Energy and Health Applications, Faculty of Engineering and Science, Campus Bergen, Western Norway University of Applied Sciences, Bergen, KRONSTAD, D412, Norway

#### Contents

|                                                               |      |
|---------------------------------------------------------------|------|
| TD-DFT calculations of absorption spectra – additional detail | (S1) |
| FTIR Spectra of isolated and commercial berberine             | (S2) |
| Electron micrographs of isolated berberine                    | (S3) |
| Energy-dispersive analysis of X-rays – mapping and spectra    | (S4) |

## 1. TD-DFT calculations of absorption spectra – additional detail



**Figure S1:** Simulated absorption spectra of the berberine cation in water, acetonitrile, and vacuum. The model chemistry was B3LYP/6-31G(d). The figure presents a zoomed-in region of the spectrum (Fig. 7. main manuscript) showing the  $S_0 \rightarrow S_1$  transition more clearly.

## 2. FTIR Spectra of isolated and commercial berberine



**Figure S2:** (a) FTIR spectra of the purified, isolated product and of a commercial sample of berberine chloride. (b) The fingerprint region of the FTIR spectra. The resolution was  $4 \text{ cm}^{-1}$  in both cases and the spectra are offset on the y-axis for clarity.

### 3. SEM Images of crystals of the isolated berberine chloride



**Figure S3:** Electron micrograph of crystals of berberine chloride isolated from *Coscinium fenestratum*.

#### 4. Energy dispersive X-ray Analysis of the isolated berberine chloride



**Figure S4:** Electron microscopy and energy-dispersive X-ray spectra of crystals of berberine chloride isolated from *Coscinium fenestratum*. (a) Electron micrograph of a crystallite. (b) False colour EDX map of Cl Ka and (c) EDX spectrum, Intensity / kcounts against energy. In (a) and (b) the scale bar represents 50 μm.

These maps and spectra confirm the presence of chloride as the counteranion in the isolated berberine samples.
